# Supplementary material for: Separation of pyrrolidine from tetrahydrofuran by using pillar[6]arene-based nonporous adaptive crystals
Source: Royal Society of Chemistry journal article supplement (doi:10.1039/d2sc02494b), 2022-01-01
Supplement: d2sc02494b1.pdf [file d2sc02494b1.pdf]

## Separation of pyrrolidine from tetrahydrofuran by pillar[6]arene-based nonporous adaptive crystals

Jiajun Cao,<sup>a,†</sup> Yitao Wu,<sup>a,†</sup> Qi Li,<sup>a</sup> Weijie Zhu,<sup>a</sup> Zeju Wang,<sup>a</sup> Yang Liu,<sup>a</sup> Kecheng Jie,<sup>a</sup> Huangtianzhi Zhu,<sup>a\*</sup> Feihe Huang<sup>a,b,c,\*</sup>

[a] J. Cao, Y. Wu, Q. Li, W. Zhu, Z. Wang, Y. Liu, Dr. H. Zhu, Prof. Dr. F. Huang

State Key Laboratory of Chemical Engineering, Stoddart Institute of Molecular Science, Department of Chemistry, Zhejiang University, Hangzhou 310027, P. R. China, Fax and Tel: +86-571-8795-3189, E-mail: htzzhu@zju.edu.cn, [fhuang@zju.edu.cn](mailto:fhuang@zju.edu.cn)

[b] Prof. Dr. F. Huang

ZJU-Hangzhou Global Scientific and Technological Innovation Center, Hangzhou 311215, China

[c] Prof. Dr. F. Huang

Green Catalysis Center and College of Chemistry, Zhengzhou University, Zhengzhou 450001, P. R. China

[†] These authors contributed equally

## Electronic Supplementary Information (ESI, 22 pages)

|                                                              |     |
|--------------------------------------------------------------|-----|
| 1. <i>Materials</i>                                          | S3  |
| 2. <i>Methods</i>                                            | S3  |
| 3. <i>Crystallography Data</i>                               | S5  |
| 4. <i>Characterization of Activated Pillararene Crystals</i> | S7  |
| 5. <i>Vapor-Phase Adsorption Measurements</i>                | S10 |
| 6. <i>Recyclability of EtP6<math>\beta</math></i>            | S21 |
| 7. <i>References</i>                                         | S22 |

## 1. Materials

All reagents were commercially available and used as supplied without further purification. Solvents were either employed as purchased or dried according to procedures described in the literature. Pillar[*n*]arenes (**EtP5** and **EtP6**) were synthesized as described previously.<sup>S1</sup> Activated crystalline **EtP5** and **EtP6** were referred to as **EtP5 $\alpha$**  and **EtP6 $\beta$** , respectively. **EtP5 $\alpha$**  and **EtP6 $\beta$**  were prepared according to reported procedures.<sup>S2</sup>

**Table S1.** Physical properties of pyrrolidine and THF

| Substance   | Melting point (°C) | Boiling point (°C) | Saturated Vapor Pressure at 298 K (kPa) |
|-------------|--------------------|--------------------|-----------------------------------------|
| Pyrrolidine | -63.0              | 87.0               | 1.80                                    |
| THF         | -108               | 66.8               | 19.3                                    |

## 2. Methods

### 2.1. Powder X-Ray Diffraction

PXRD data were collected on a Rigaku Ultimate-IV X-Ray diffractometer operating at 40 kV/30 mA using the Cu K $\alpha$  line ( $\lambda = 1.5418 \text{ \AA}$ ). Data were measured over the range of 5–45° in 5°/min steps over 8 min.

### 2.2. Thermogravimetric analysis

Thermogravimetric analysis (TGA) was carried out on a DSCQ1000 Thermal Gravimetric Analyzer with an automated vertical overhead thermobalance. The samples were heated in 10 °C/min steps over 8 min.

### 2.3. Single Crystal Growth

Single crystals of guest-loaded **EtP5** and **EtP6** were grown by volatilization: 5.00 mg of dry **EtP5** or **EtP6** powder were put in a small vial where 1.00 mL of guest was added and the vial was heated until all the powder was dissolved. The crystals were got by volatilization for 2-7 days.

### 2.4. Single Crystal X-ray Diffraction

Single crystal X-ray diffraction data were collected on a Bruker D8 VENTURE CMOS X-ray diffractometer with graphite monochromatic GaK $\alpha$  radiation ( $\lambda = 0.71073 \text{ \AA}$ ).

## 2.6. Solution $^1\text{H}$ NMR Spectroscopy

$^1\text{H}$  NMR spectra were recorded using a Bruker Avance DMX 400 spectrometer and a Bruker Avance DMX 600 spectrometer.

## 2.7. Gas Chromatography

Gas chromatographic (GC) analysis: GC measurements were carried out using an Agilent 7890B instrument configured with an FID detector and a DB-624 column ( $30 \text{ m} \times 0.53 \text{ mm} \times 3.0 \text{ }\mu\text{m}$ ). Samples were analyzed using headspace injections and were performed by incubating the sample at  $70 \text{ }^\circ\text{C}$  for 10 min followed by sampling 1.00 mL of the headspace. The total volume of the container was 10 mL; the mass of the solid in the container was about 10 mg; the total volume of the headspace was 1 mL. The following GC method was used: the oven was programmed from  $50 \text{ }^\circ\text{C}$ , and ramped in  $10 \text{ }^\circ\text{C min}^{-1}$  increments to  $150 \text{ }^\circ\text{C}$  with 15 min hold; the total run time was 25 min; the injection temperature was  $250 \text{ }^\circ\text{C}$ ; the detector temperature was  $280 \text{ }^\circ\text{C}$  with nitrogen, air, and make-up flow-rates of 35, 350, and  $35 \text{ mL min}^{-1}$ , respectively; helium (carrier gas) flow-rate was  $3.0 \text{ mL min}^{-1}$ . The samples were injected in the split mode (30:1).

### 3. Crystallographic Data

**Table S2.** Experimental single crystal X-ray data for the pyrrolidine@**EtP5** structure

|                                             | pyrrolidine@ <b>EtP5</b>                                         |
|---------------------------------------------|------------------------------------------------------------------|
| Crystallization Solvent                     | Pyrrolidine                                                      |
| Empirical formula                           | C <sub>61</sub> H <sub>82</sub> N <sub>1.5</sub> O <sub>10</sub> |
| Formula weight                              | 996.28                                                           |
| Temperature/K                               | 170                                                              |
| Crystal system                              | triclinic                                                        |
| Space group                                 | P-1                                                              |
| a/Å                                         | 14.9616(5)                                                       |
| b/Å                                         | 16.3732(6)                                                       |
| c/Å                                         | 24.4025(10)                                                      |
| α/°                                         | 109.598(3)                                                       |
| β/°                                         | 98.054(2)                                                        |
| γ/°                                         | 90.000(2)                                                        |
| Volume/Å <sup>3</sup>                       | 5568.9(4)                                                        |
| Z                                           | 4                                                                |
| ρ <sub>calc</sub> /cm <sup>3</sup>          | 1.188                                                            |
| μ/mm <sup>-1</sup>                          | 0.408                                                            |
| F(000)                                      | 2154                                                             |
| Crystal size/mm <sup>3</sup>                | 0.16 × 0.15 × 0.06                                               |
| Radiation                                   | GaKα (λ = 1.34139)                                               |
| 2θ range for data collection/°              | 5.764 to 110.29                                                  |
| Reflections collected                       | 19009                                                            |
| Independent reflections                     | 19009 [R <sub>int</sub> = 0.0986, R <sub>sigma</sub> = 0.1108]   |
| Data/restraints/parameters                  | 19009/30/1327                                                    |
| Goodness-of-fit on F <sup>2</sup>           | 1.027                                                            |
| Final R indexes [I >= 2σ (I)]               | R <sub>1</sub> = 0.0986, wR <sub>2</sub> = 0.2537                |
| Final R indexes [all data]                  | R <sub>1</sub> = 0.1502, wR <sub>2</sub> = 0.3009                |
| Largest diff. peak/hole / e Å <sup>-3</sup> | 1.26/-0.56                                                       |
| CCDC                                        | 2132123                                                          |

**Table S3.** Experimental single crystal X-ray data for the pyrrolidine@**EtP6** and 2THF@**EtP6** structures

|                                             | pyrrolidine@ <b>EtP6</b>                                      | 2THF@ <b>EtP6</b>                                             |
|---------------------------------------------|---------------------------------------------------------------|---------------------------------------------------------------|
| Crystallization Solvent                     | pyrrolidine                                                   | THF                                                           |
| Empirical formula                           | C <sub>70</sub> H <sub>89</sub> NO <sub>12</sub>              | C <sub>70</sub> H <sub>92</sub> O <sub>13</sub>               |
| Formula weight                              | 1136.42                                                       | 1141.43                                                       |
| Temperature/K                               | 193                                                           | 213                                                           |
| Crystal system                              | orthorhombic                                                  | monoclinic                                                    |
| Space group                                 | Fddd                                                          | P2/n                                                          |
| a/Å                                         | 12.5560(3)                                                    | 12.5731(4)                                                    |
| b/Å                                         | 26.6378(7)                                                    | 22.6648(7)                                                    |
| c/Å                                         | 45.7727(10)                                                   | 14.4358(4)                                                    |
| α/°                                         | 90                                                            | 90                                                            |
| β/°                                         | 90                                                            | 113.995(2)                                                    |
| γ/°                                         | 90                                                            | 90                                                            |
| Volume/Å <sup>3</sup>                       | 15309.3(6)                                                    | 3758.2(2)                                                     |
| Z                                           | 8                                                             | 2                                                             |
| ρ <sub>calc</sub> /cm <sup>3</sup>          | 0.986                                                         | 1.009                                                         |
| μ/mm <sup>-1</sup>                          | 0.342                                                         | 0.349                                                         |
| F(000)                                      | 4896                                                          | 1232                                                          |
| Crystal size/mm <sup>3</sup>                | 0.06 × 0.06 × 0.05                                            | 0.07 × 0.07 × 0.05                                            |
| Radiation                                   | GaKα (λ = 1.34139)                                            | GaKα (λ = 1.34139)                                            |
| 2θ range for data collection/°              | 8.444 to 109.904                                              | 7.656 to 109.988                                              |
| Reflections collected                       | 50740                                                         | 38978                                                         |
| Independent reflections                     | 3627 [R <sub>int</sub> = 0.0588, R <sub>sigma</sub> = 0.0262] | 7131 [R <sub>int</sub> = 0.0666, R <sub>sigma</sub> = 0.0476] |
| Data/restraints/parameters                  | 3627/70/225                                                   | 7131/40/404                                                   |
| Goodness-of-fit on F <sup>2</sup>           | 1.034                                                         | 0.949                                                         |
| Final R indexes [I ≥ 2σ (I)]                | R <sub>1</sub> = 0.0929, wR <sub>2</sub> = 0.2533             | R <sub>1</sub> = 0.0982, wR <sub>2</sub> = 0.2222             |
| Final R indexes [all data]                  | R <sub>1</sub> = 0.1093, wR <sub>2</sub> = 0.2659             | R <sub>1</sub> = 0.1261, wR <sub>2</sub> = 0.2387             |
| Largest diff. peak/hole / e Å <sup>-3</sup> | 0.67/-0.33                                                    | 0.73/-0.33                                                    |
| CCDC                                        | 2132121                                                       | 2132122                                                       |

#### 4. Characterization of Activated Pillararene Crystals

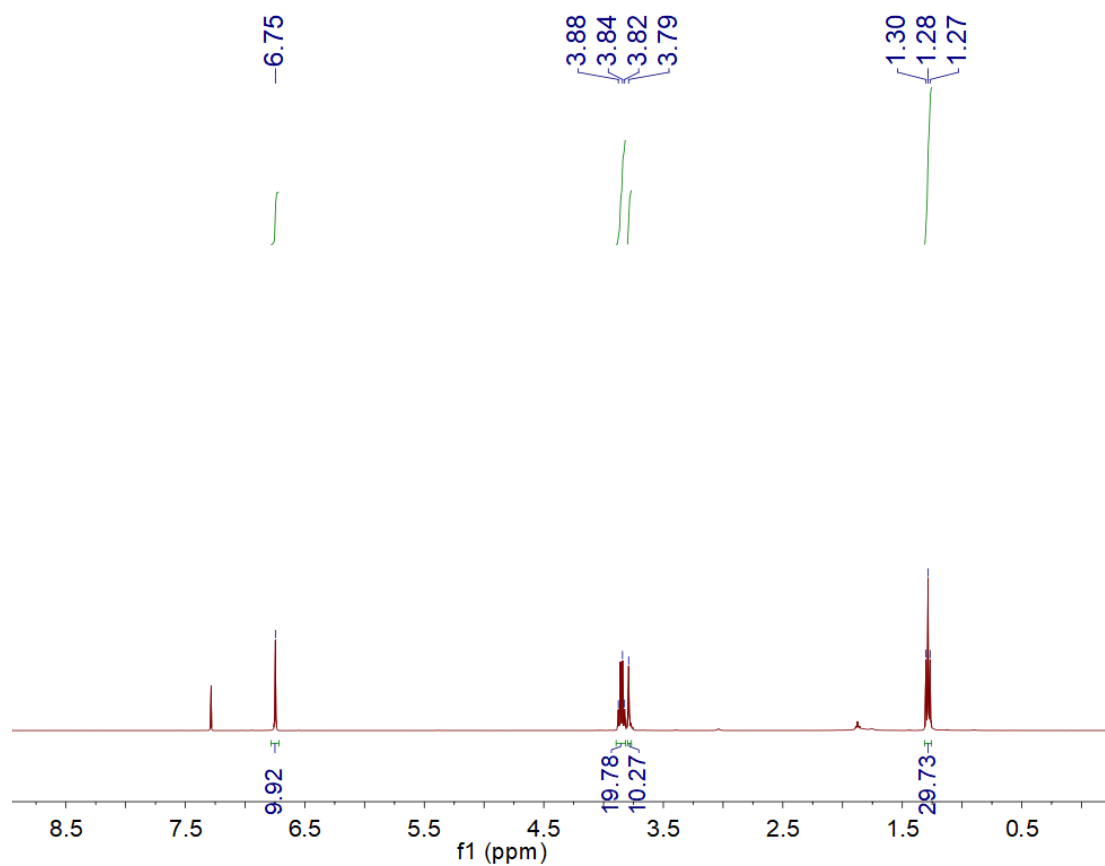

**Fig. S1.**  $^1\text{H}$  NMR spectrum (400 MHz,  $\text{CDCl}_3$ , 298 K) of **EtP5**.

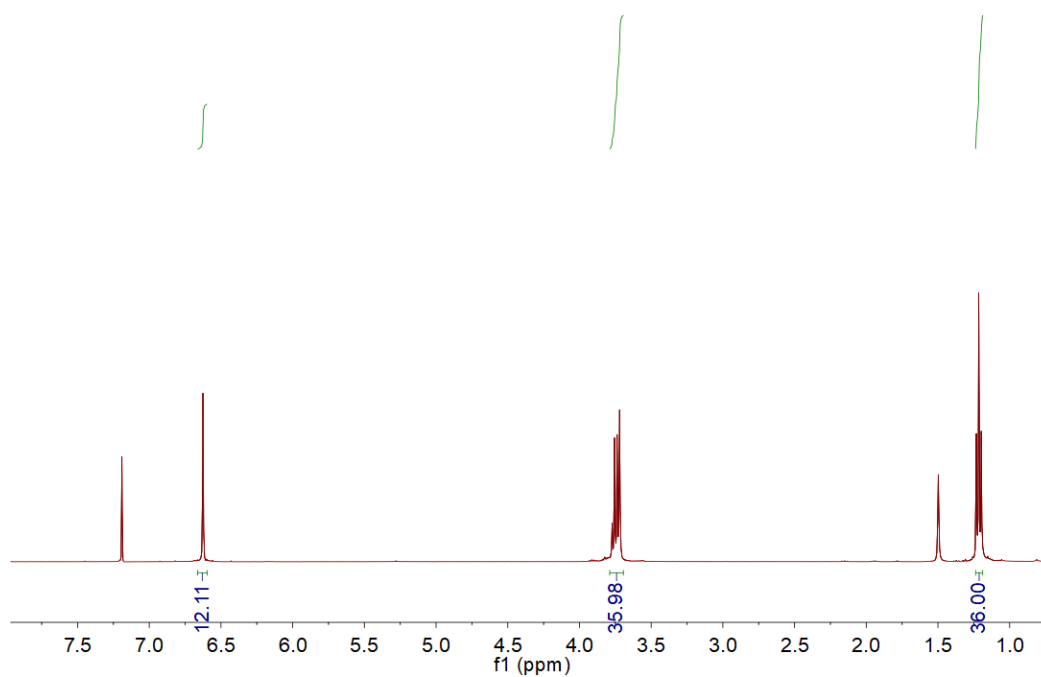

**Fig. S2.**  $^1\text{H}$  NMR spectrum (400 MHz,  $\text{CDCl}_3$ , 298 K) of **EtP6**.

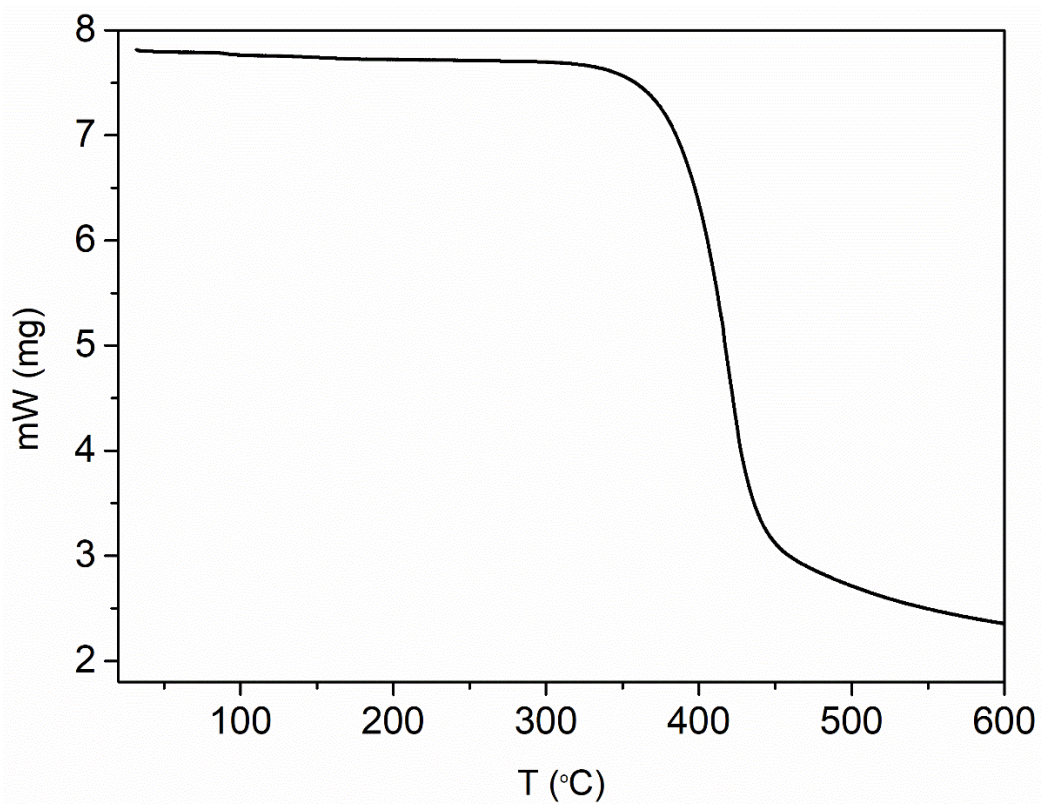

**Fig. S3.** TGA curve of desolvated **EtP5 $\alpha$**

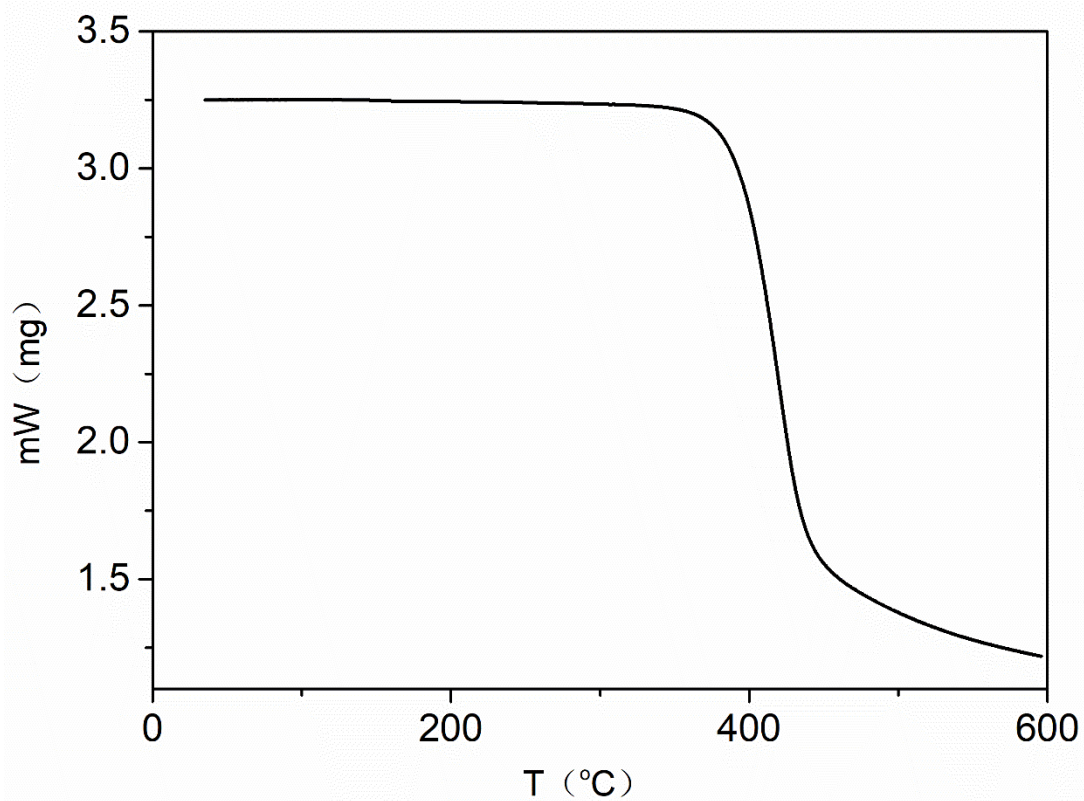

**Fig. S4.** TGA curve of desolvated **EtP6 $\beta$**



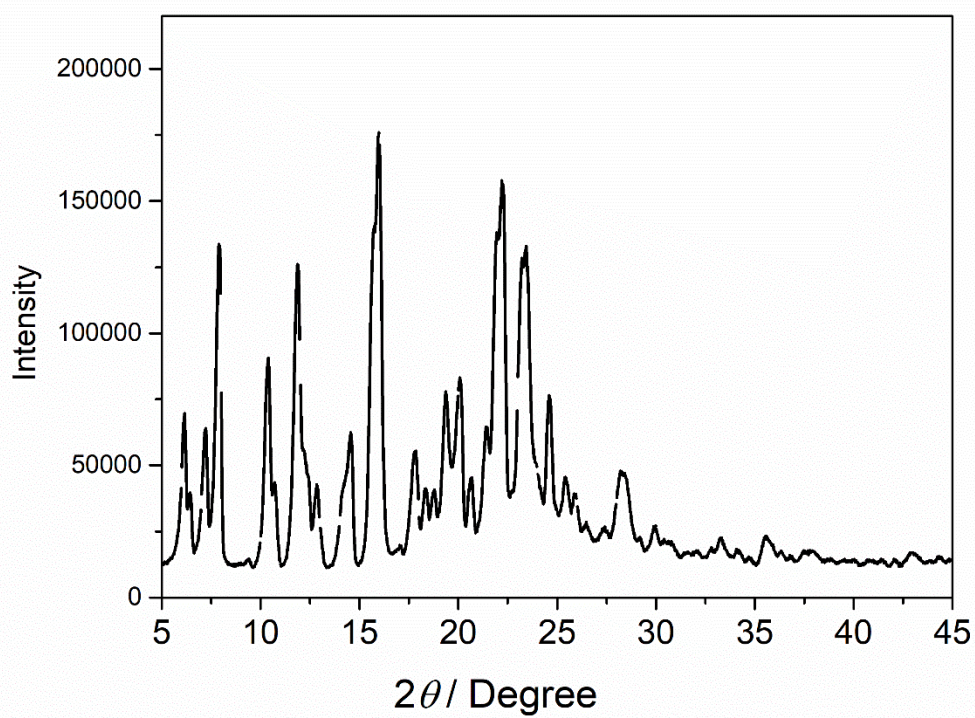

**Fig. S5.** PXRD pattern of **EtP5 $\alpha$**

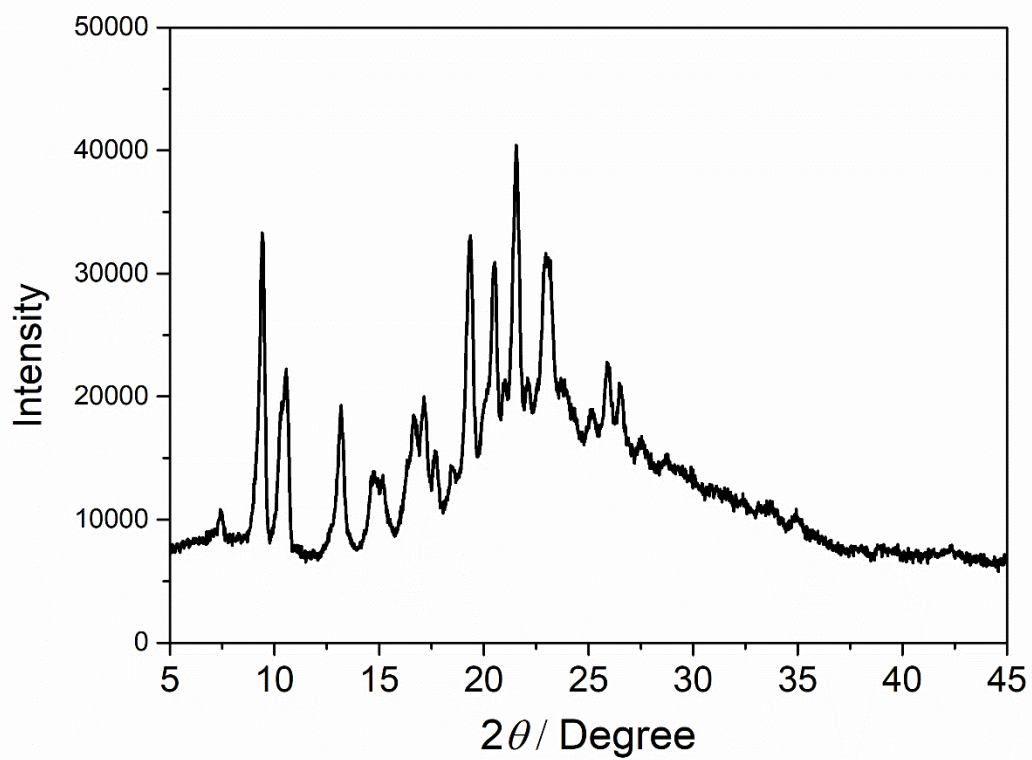

**Fig. S6.** PXRD pattern of **EtP6 $\beta$** .

## 5. Vapor-Phase Adsorption Measurements

### 5.1. Single-Component THF and pyrrolidine adsorption

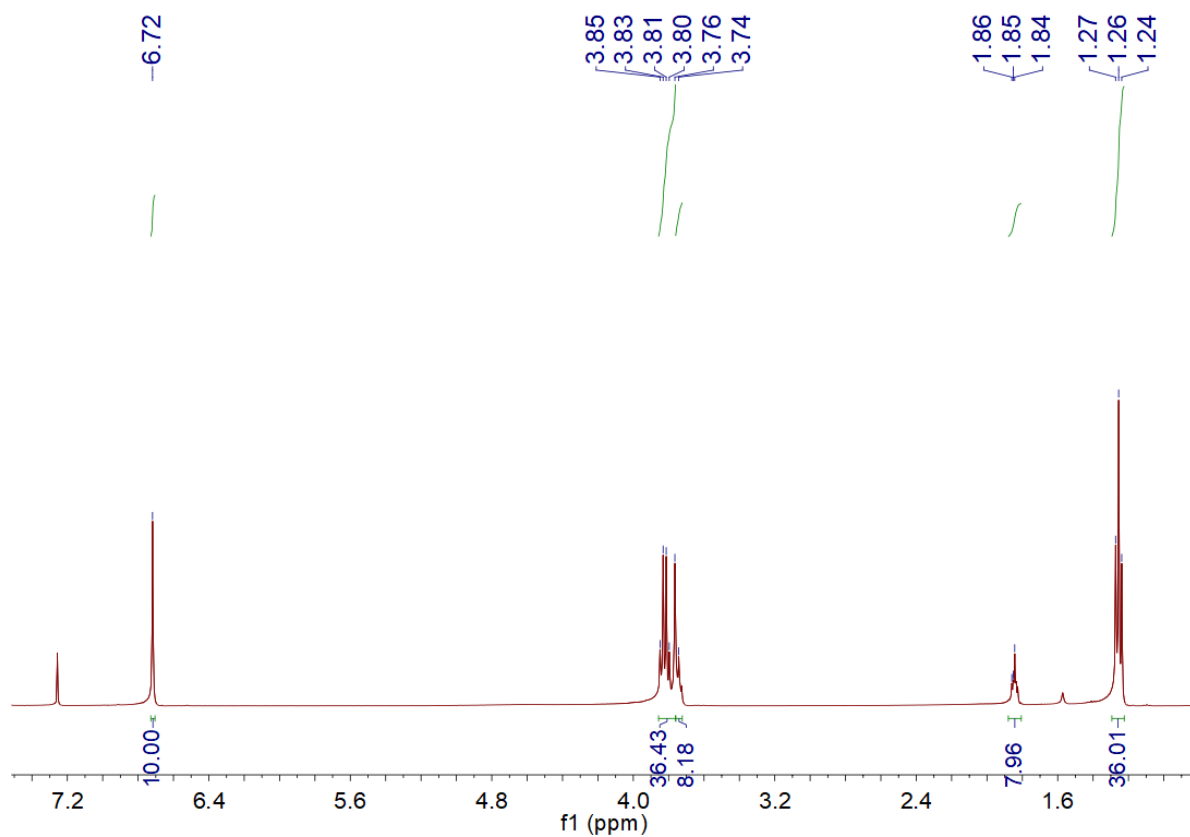

**Fig. S7.**  $^1\text{H}$  NMR spectrum (400 MHz,  $\text{CDCl}_3$ , 298 K) of **EtP5** $\alpha$  after adsorption of THF vapor.

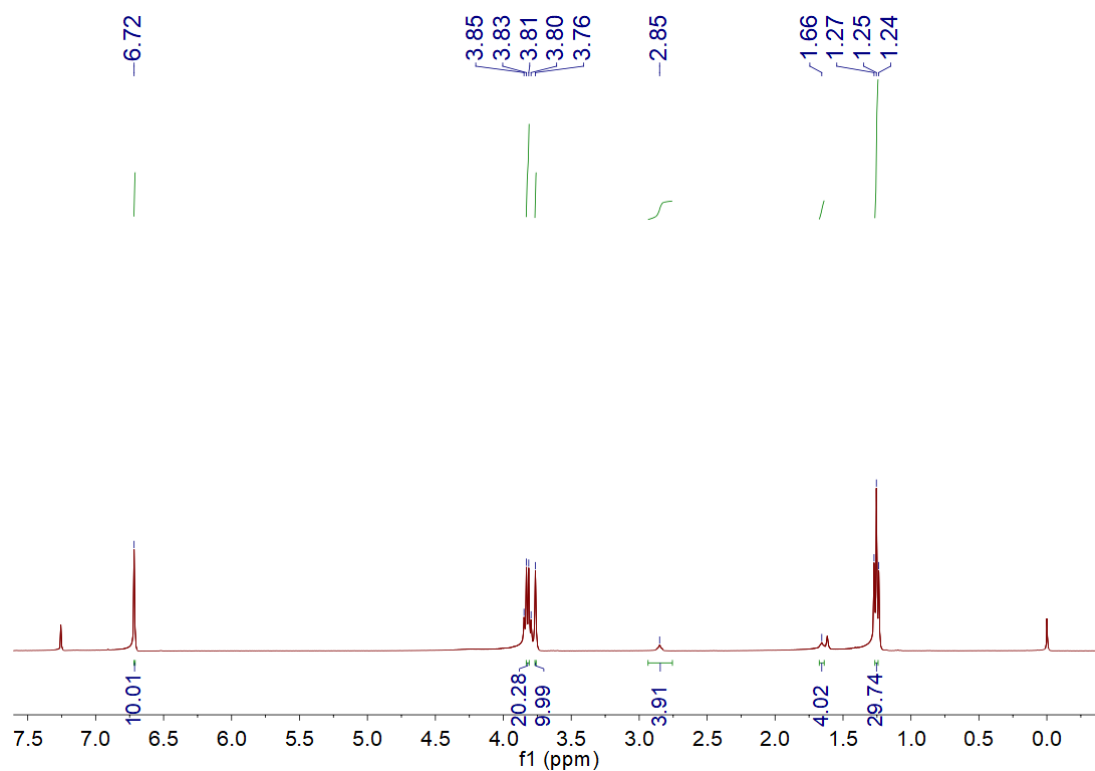

**Fig. S8.**  $^1\text{H}$  NMR spectrum (400 MHz,  $\text{CDCl}_3$ , 298 K) of **EtP5** $\alpha$  after adsorption of pyrrolidine vapor.

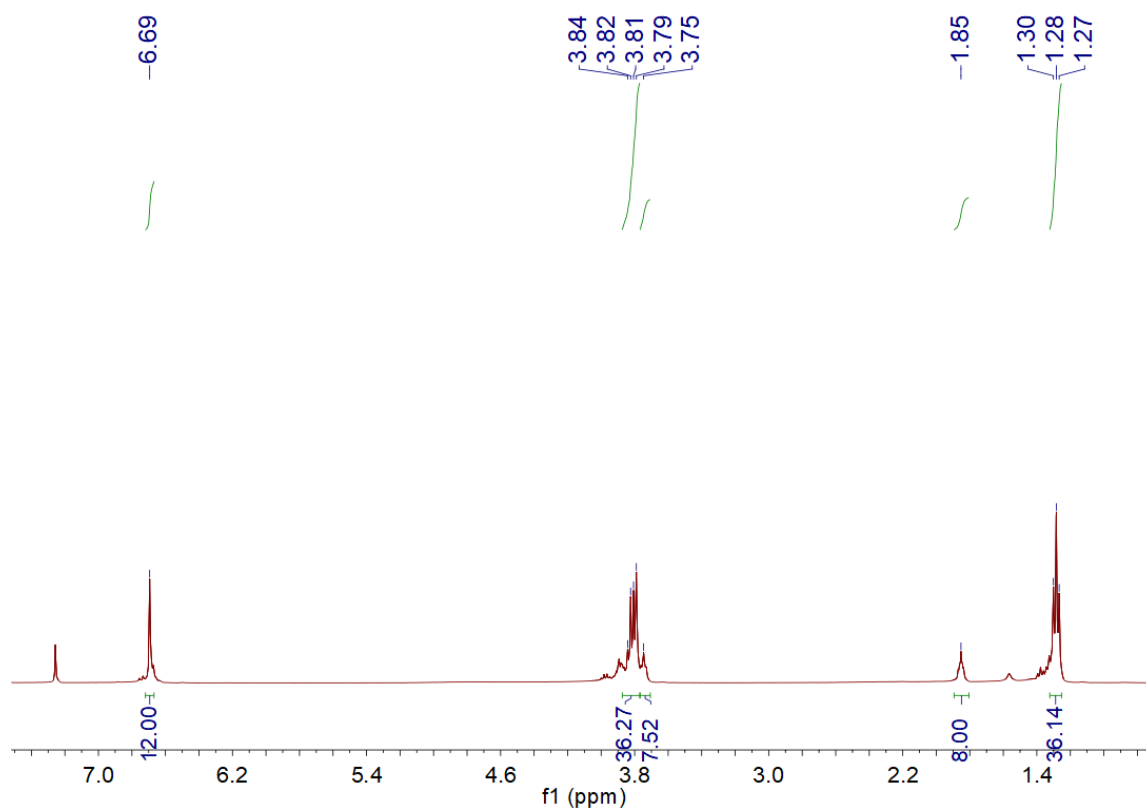

**Fig. S9.**  $^1\text{H}$  NMR spectrum (400 MHz,  $\text{CDCl}_3$ , 298 K) of **EtP6 $\beta$**  after adsorption of THF vapor.

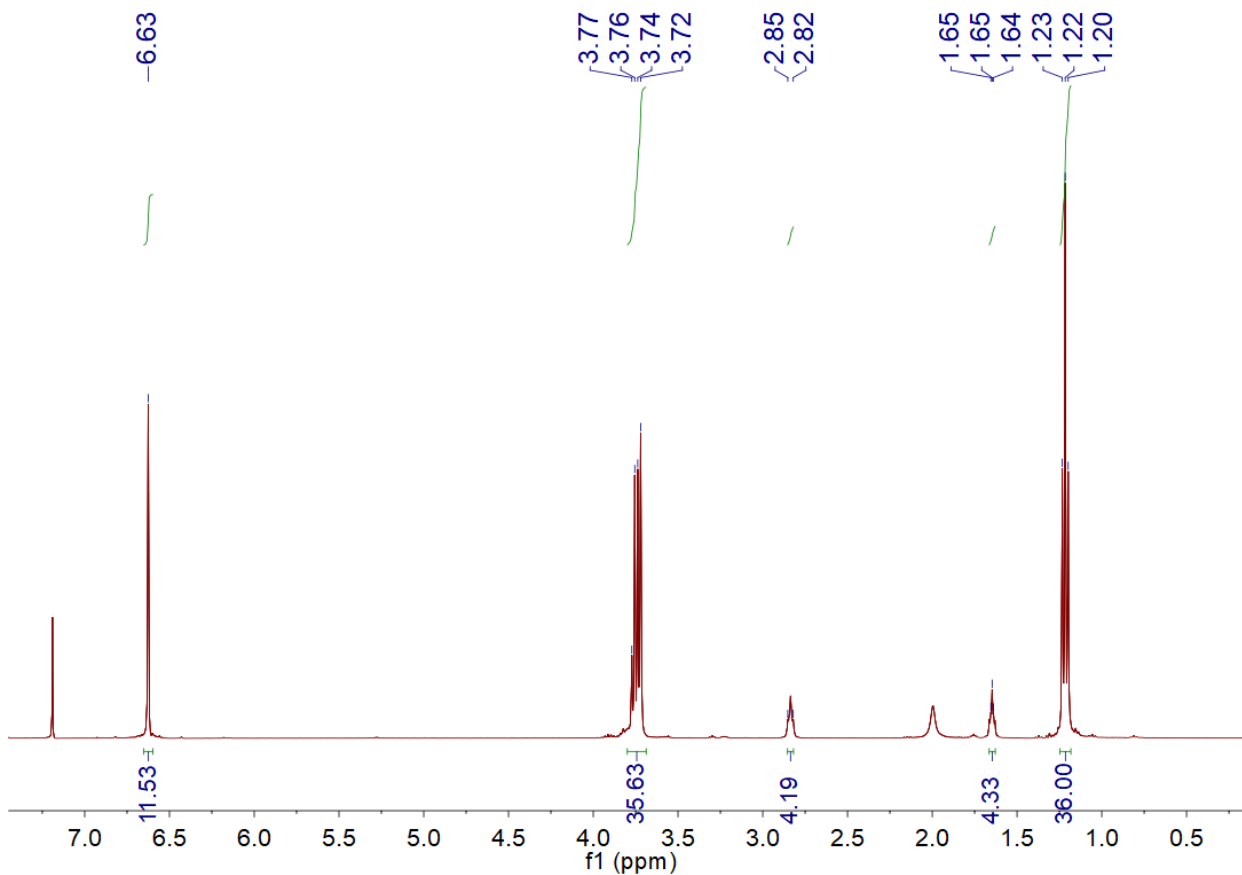

**Fig. S10.**  $^1\text{H}$  NMR spectrum (400 MHz,  $\text{CDCl}_3$ , 298 K) of **EtP6 $\beta$**  after adsorption of pyrrolidine vapor.

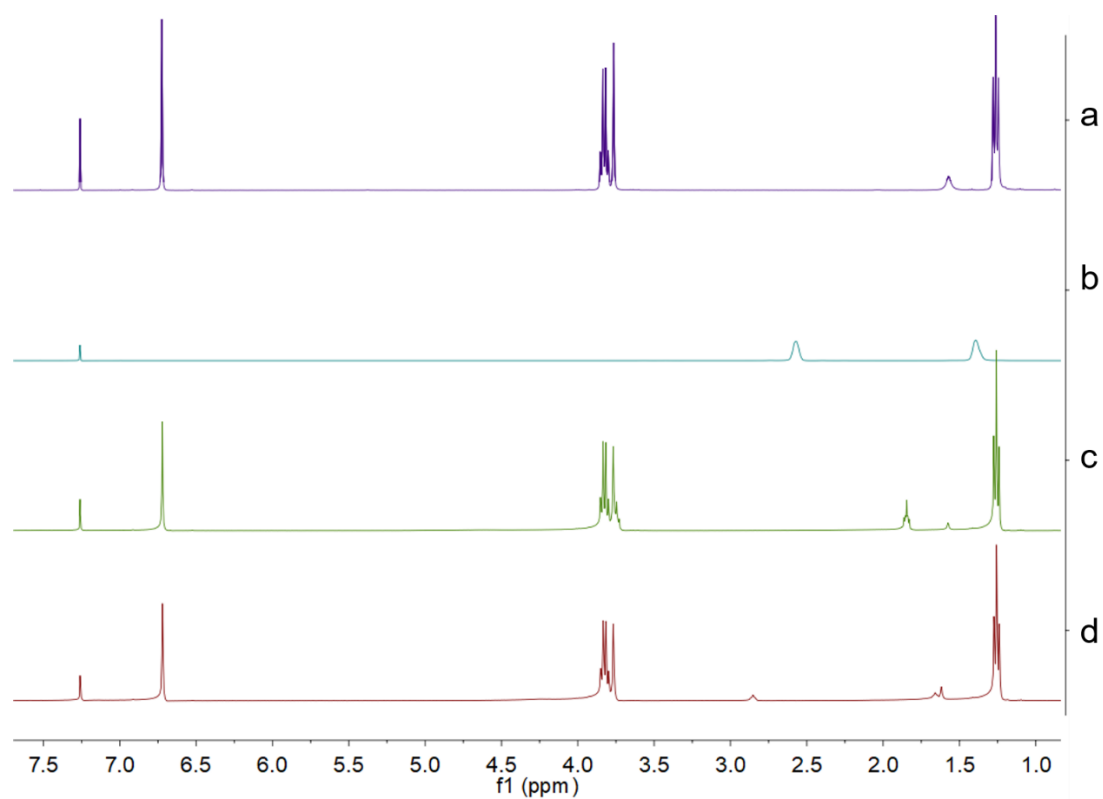

**Fig. S11.** <sup>1</sup>H NMR spectra (400 MHz, CDCl<sub>3</sub>, 298 K): (a) **EtP5**; (b) pyrrolidine; (c) a mixture of THF and **EtP5**; (d) a mixture of pyrrolidine and **EtP5**.

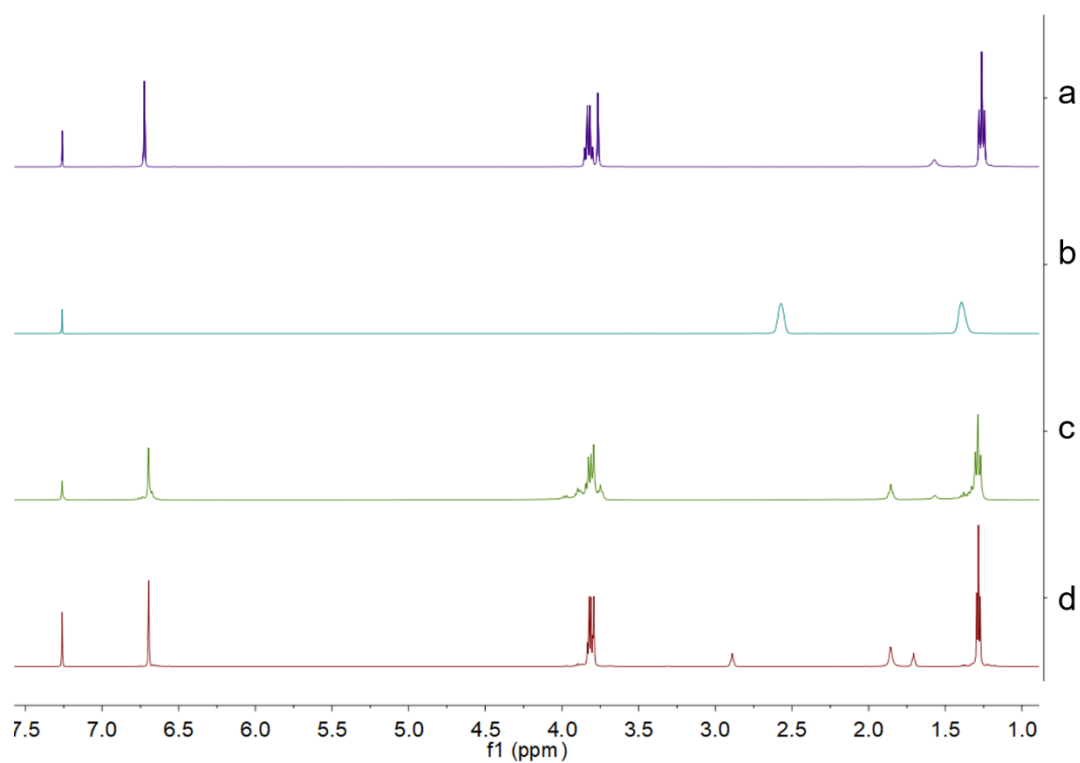

**Fig. S12.** <sup>1</sup>H NMR spectra (400 MHz, CDCl<sub>3</sub>, 298 K): (a) **EtP6**; (b) pyrrolidine; (c) a mixture of THF and **EtP6**; (d) a mixture of pyrrolidine and **EtP6**.

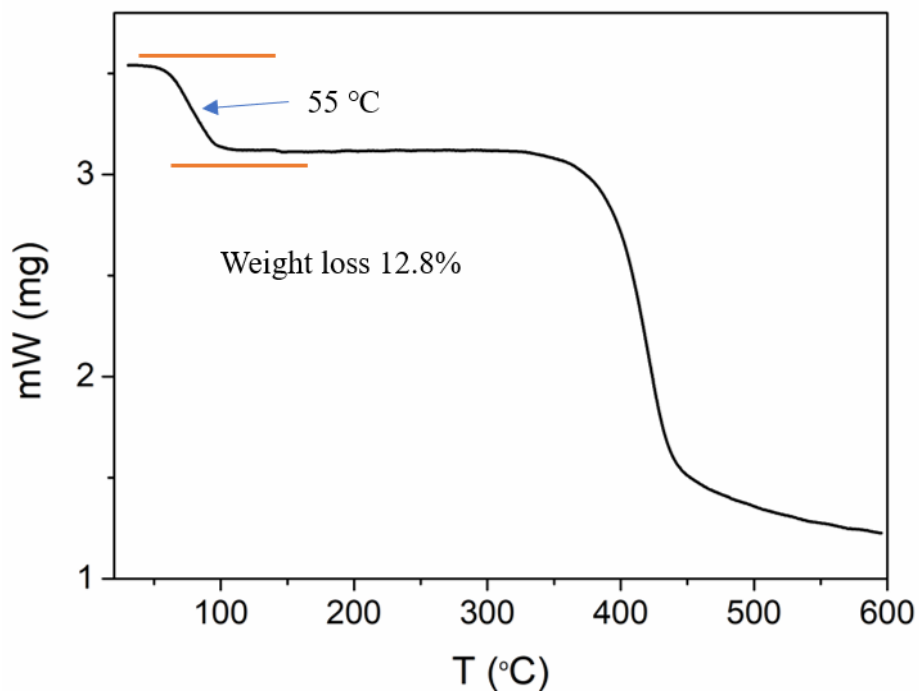

**Fig. S13.** TGA curve of desolvated **EtP5 $\alpha$**  after sorption of THF vapor. The weight loss below 100 °C can be calculated as two THF molecules per **EtP5** molecule.

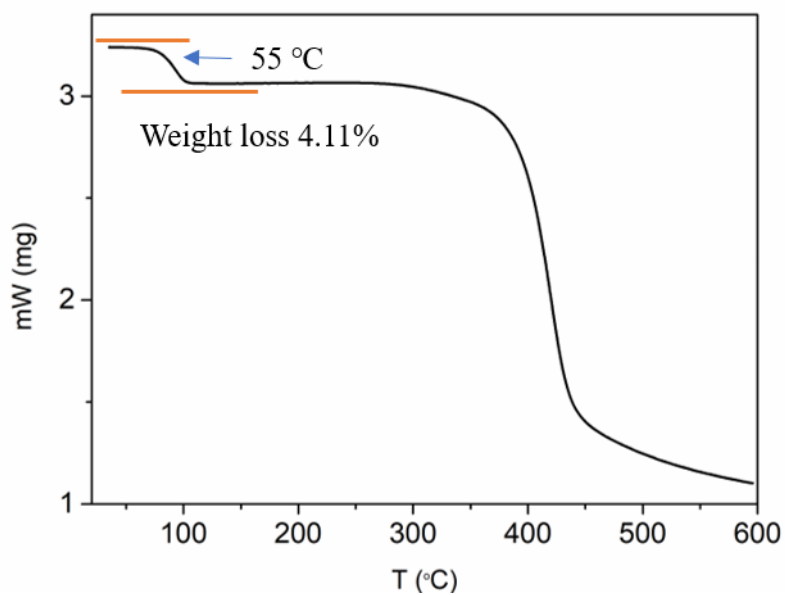

**Fig. S14.** TGA curve of desolvated **EtP5 $\alpha$**  after sorption of pyrrolidine vapor. The weight loss below 120 °C can be calculated as one pyrrolidine molecule per **EtP5** molecule.

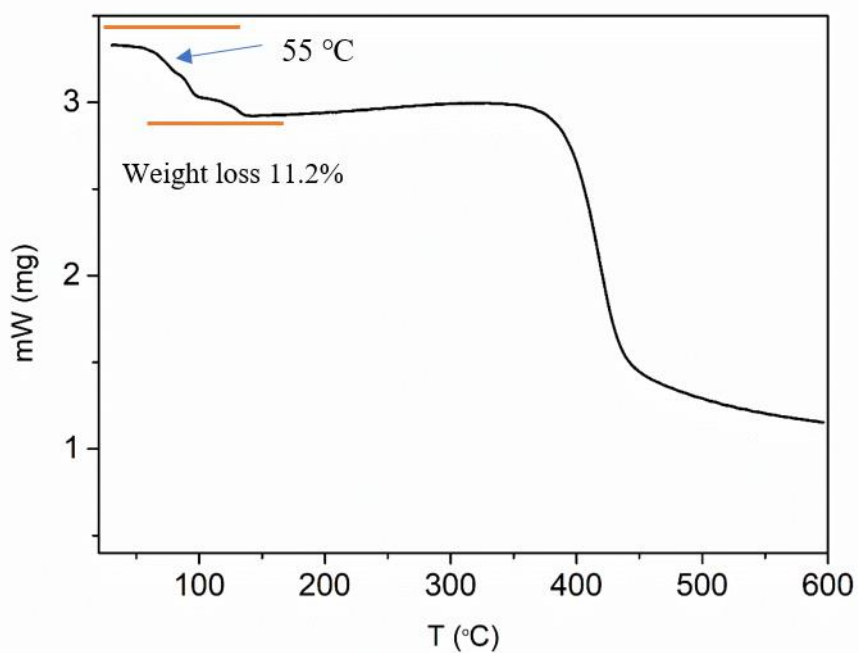

**Fig. S15.** TGA of desolvated **EtP6 $\beta$**  after sorption of THF vapor. The weight loss below 150 °C can be calculated as two THF molecule per **EtP6** molecule.

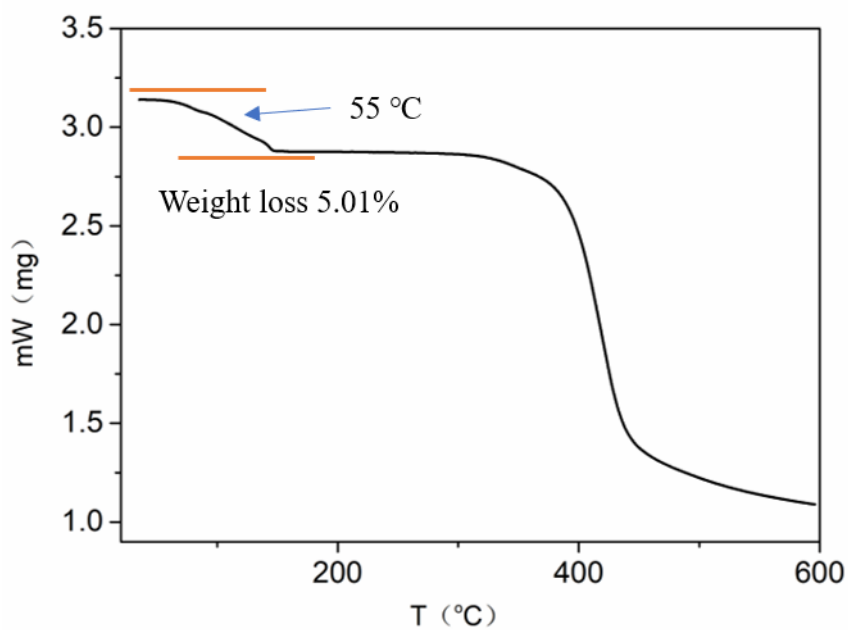

**Fig. S16.** TGA curve of desolvated **EtP6 $\beta$**  after sorption of pyrrolidine vapor. The weight loss below 150 °C can be calculated as one pyrrolidine molecule per **EtP6** molecule.

5.2. Structural analyses after single-component vapor adsorption

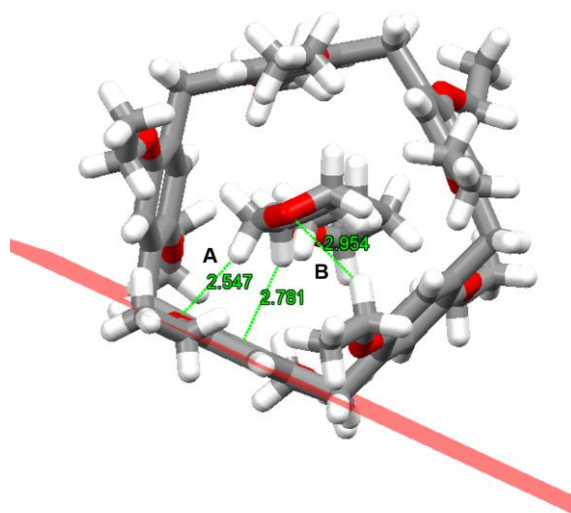

**Fig. S17.** Single crystal structure of 2THF@EtP5. C-H...O distances (Å) and C-H...O angles (deg) of hydrogen bonds: (A) 2.547, 111.82; (B) 2.954, 141.57. C-H... $\pi$  distance (Å): 2.781.

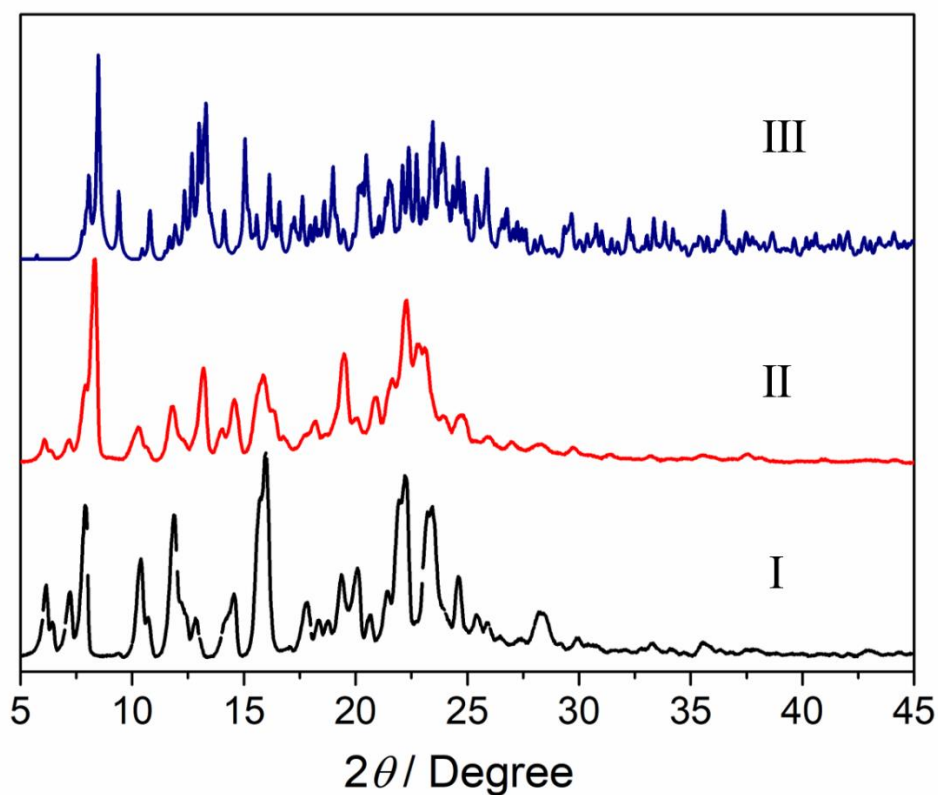

**Fig. S18.** PXRD of EtP5: (I) original EtP5 $\alpha$ ; (II) after adsorption of THF vapor; (III) simulated from the single crystal structure of 4THF@2EtP5.

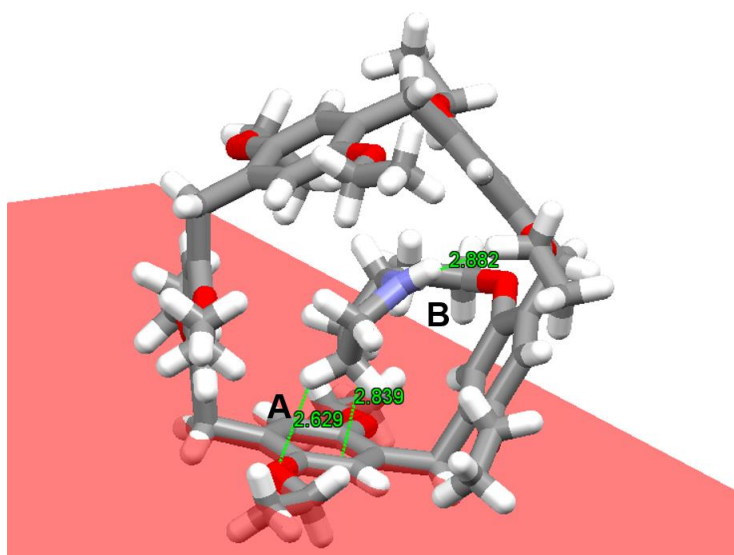

**Fig. S19.** Single crystal structure of pyrrolidine@EtP5. C–H···O distance (Å) and C–H···O angle (deg) of hydrogen bond **A**: 2.629, 101.20; N–H···O distance (Å) and N–H···O angle (deg) of hydrogen bond **B**: 2.882, 119.41; C–H··· $\pi$  distance (Å): 2.839.

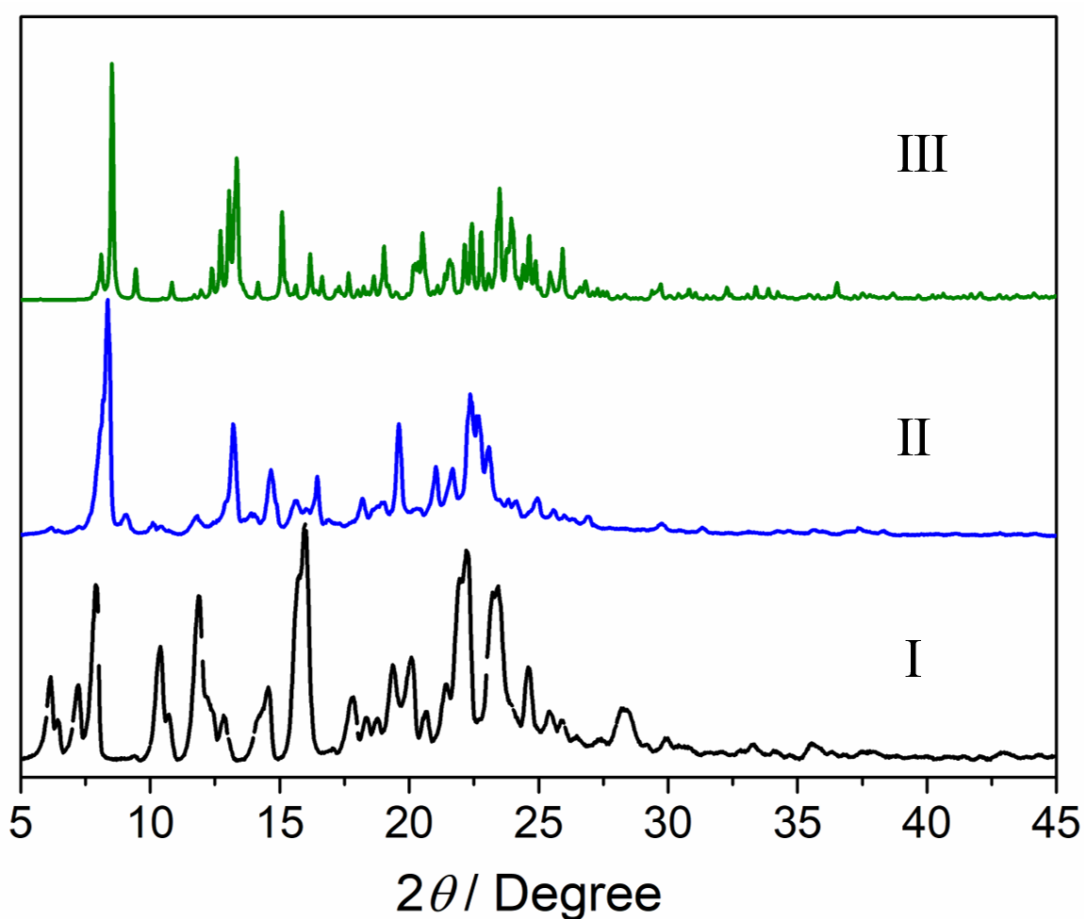

**Fig. S20.** PXRD of EtP5: (I) original EtP5 $\alpha$ ; (II) after adsorption of pyrrolidine vapor; (III) simulated from the single crystal structure of pyrrolidine@EtP5.



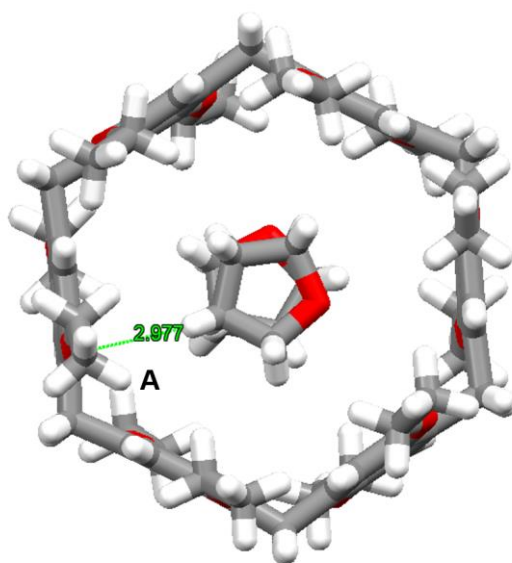

**Fig. S21.** Single crystal structure of 2THF@EtP6. C-H $\cdots$ O distance (Å) and C-H $\cdots$ O angle (deg) of hydrogen bond A: 2.977, 101.93.

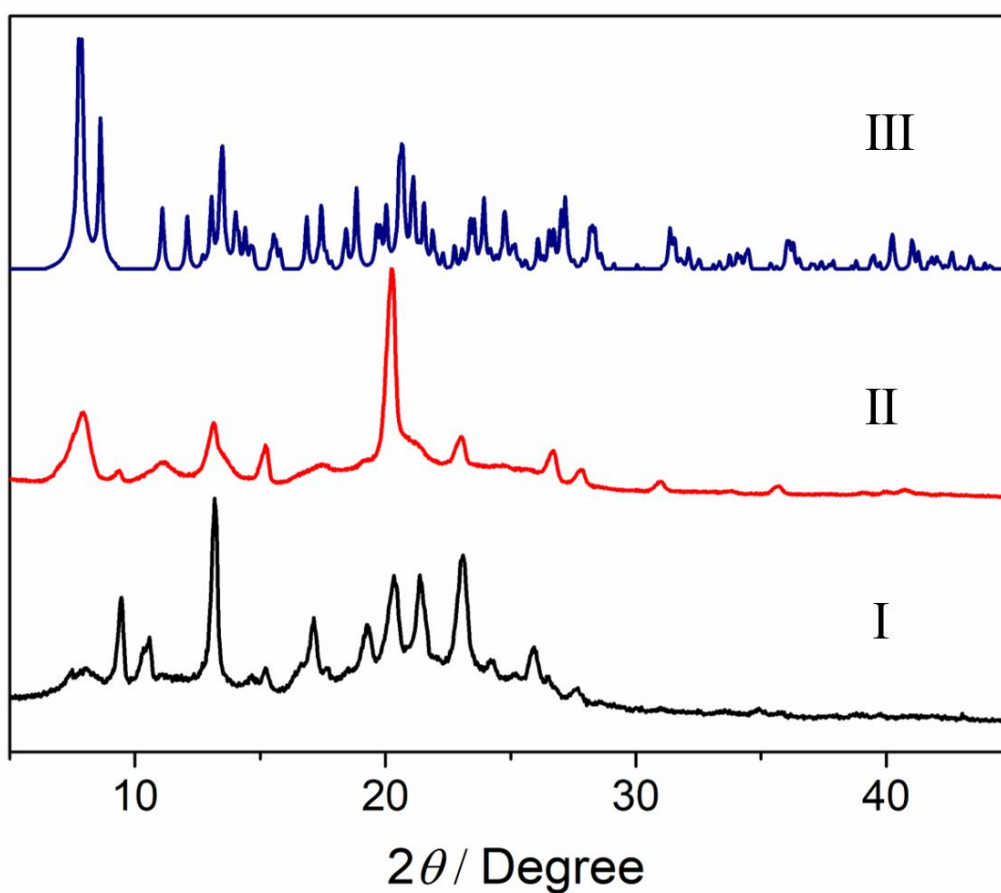

**Fig. S22.** PXRD patterns of EtP5: (I) original EtP6 $\beta$ ; (II) after adsorption of THF vapor; (III) simulated from the single crystal structure of 2THF@EtP6.

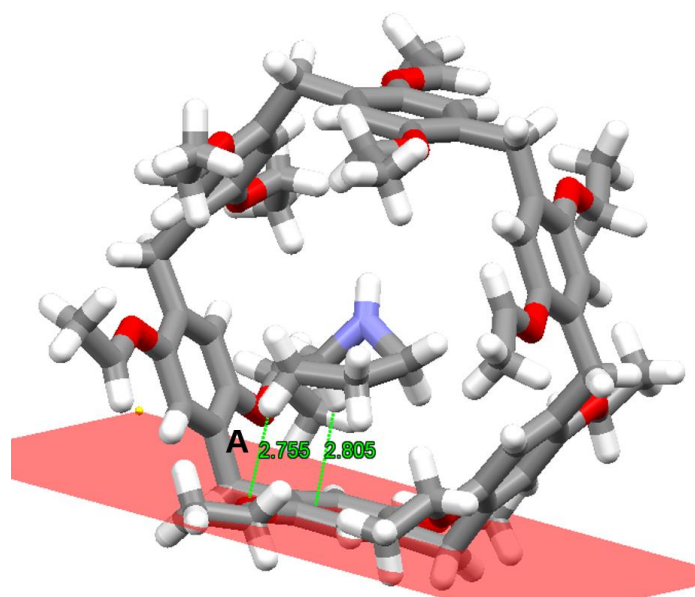

**Fig. S23.** Single crystal structure of pyrrolidine@EtP6. C–H···O distance (Å) and C–H···O angle (deg) of the hydrogen bond: 2.755, 143.99; C–H··· $\pi$  distance (Å): 2.805.

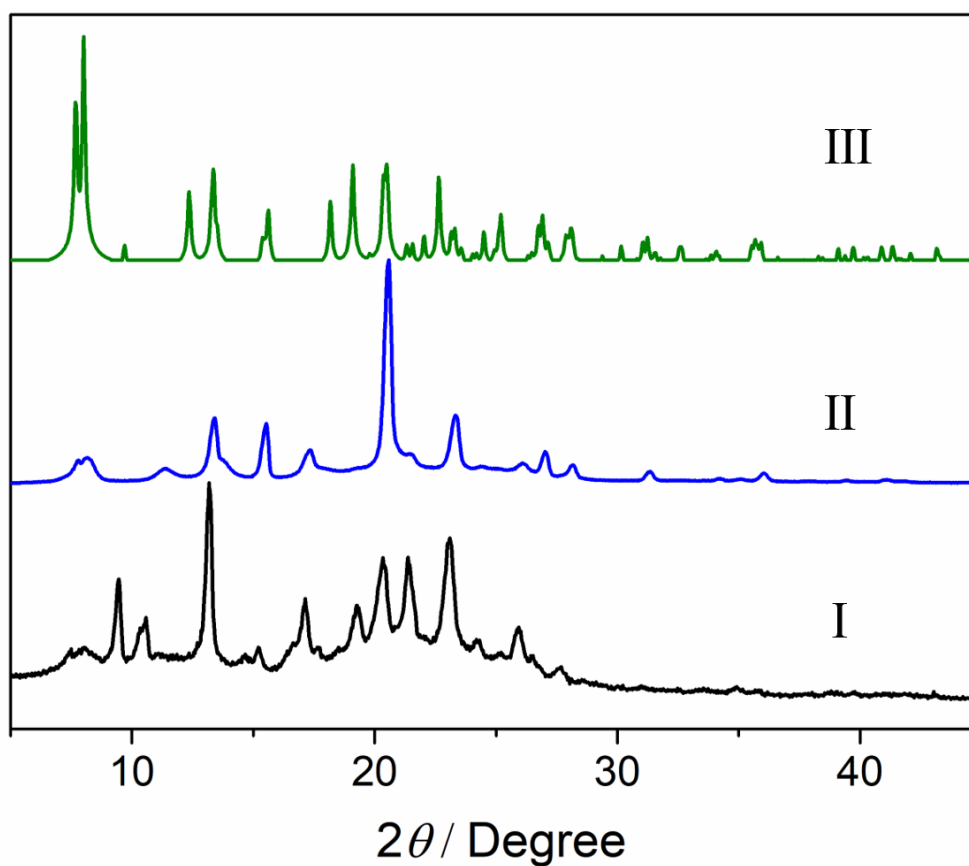

**Fig. S24.** PXRD patterns of EtP6: (I) original EtP6 $\beta$ ; (II) after adsorption of pyrrolidine vapor; (III) simulated from the single crystal structure of pyrrolidine@EtP6.

### 5.3. Uptakes of THF and pyrrolidine in **EtP5 $\alpha$**

For each experiment, an open 5.00 mL vial containing 20.00 mg of guest-free **EtP5 $\alpha$**  adsorbent was placed in a sealed 20.00 mL vial containing 1.00 mL of a 50:50 v/v THF and pyrrolidine mixture. The relative uptake of THF or pyrrolidine by **EtP5 $\alpha$**  was measured by heating the crystals to release the adsorbed vapor using GC. Before measurements, the crystals were placed in the air for 12 h to remove the surface-physically adsorbed vapor.

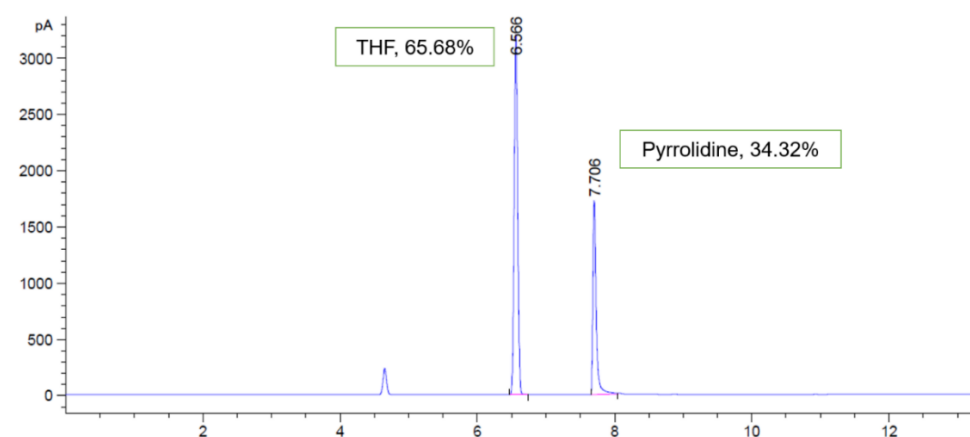

**Fig. S25.** Relative uptake of the THF/Pyrrolidine mixture (v:v = 50:50) adsorbed in **EtP5 $\alpha$**  after 6 hours using gas chromatography.

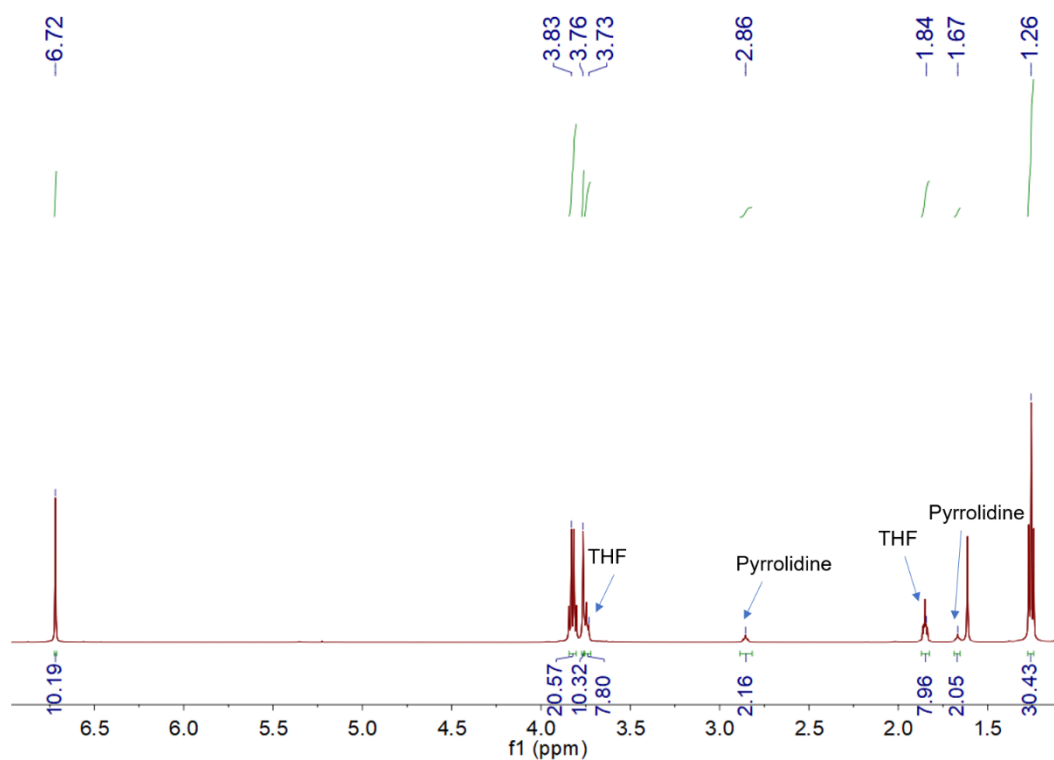

**Fig. S26.** <sup>1</sup>H NMR spectrum (600 MHz, CDCl<sub>3</sub>, 298 K) of **EtP5 $\alpha$**  after adsorption of the THF and pyrrolidine mixture vapor (v:v = 50:50).

#### 5.4. Uptakes of THF and pyrrolidine in **EtP6 $\beta$**

For each experiment, an open 5.00 mL vial containing 20.00 mg of guest-free **EtP6 $\beta$**  adsorbent was placed in a sealed 20.00 mL vial containing 1.00 mL of 50:50 v/v THF and pyrrolidine mixture. The relative uptake of THF or pyrrolidine by **EtP6 $\beta$**  was measured by heating the crystals to release the adsorbed vapor using gas chromatography. Before measurements, the crystals were placed for 12 h in the air to remove the surface-physically adsorbed vapor.

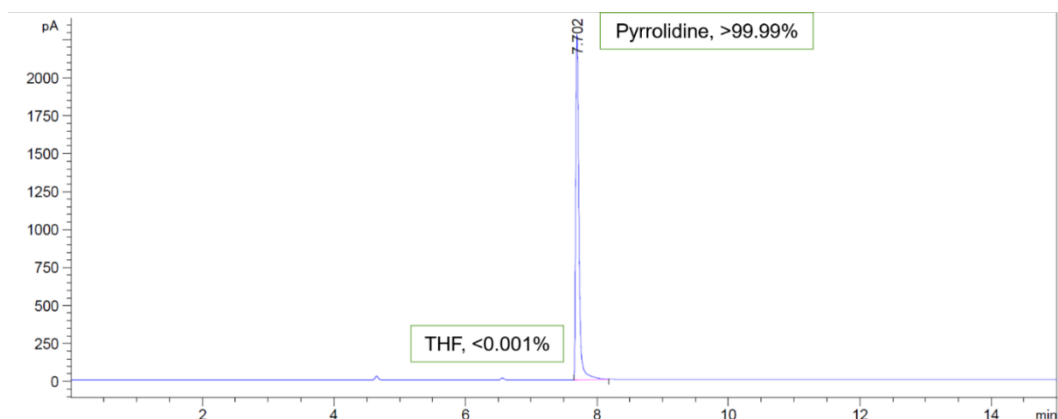

**Fig. S27.** Relative uptake of the THF/pyrrolidine mixture (v:v = 50:50) adsorbed in **EtP6 $\beta$**  after 2 hours using GC.

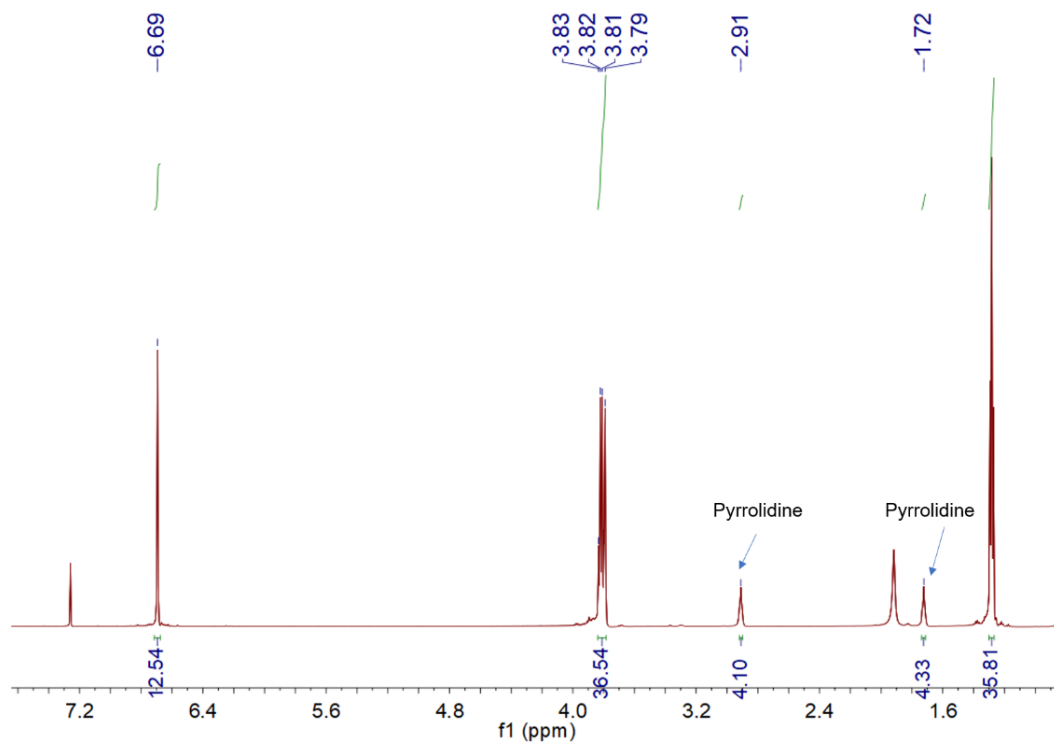

**Fig. S28.**  $^1\text{H}$  NMR spectrum (600 MHz,  $\text{CDCl}_3$ , 298 K) of **EtP6 $\beta$**  after adsorption of the THF and pyrrolidine mixture vapor (v:v = 50:50).

## 6. Recyclability of **EtP6** $\beta$

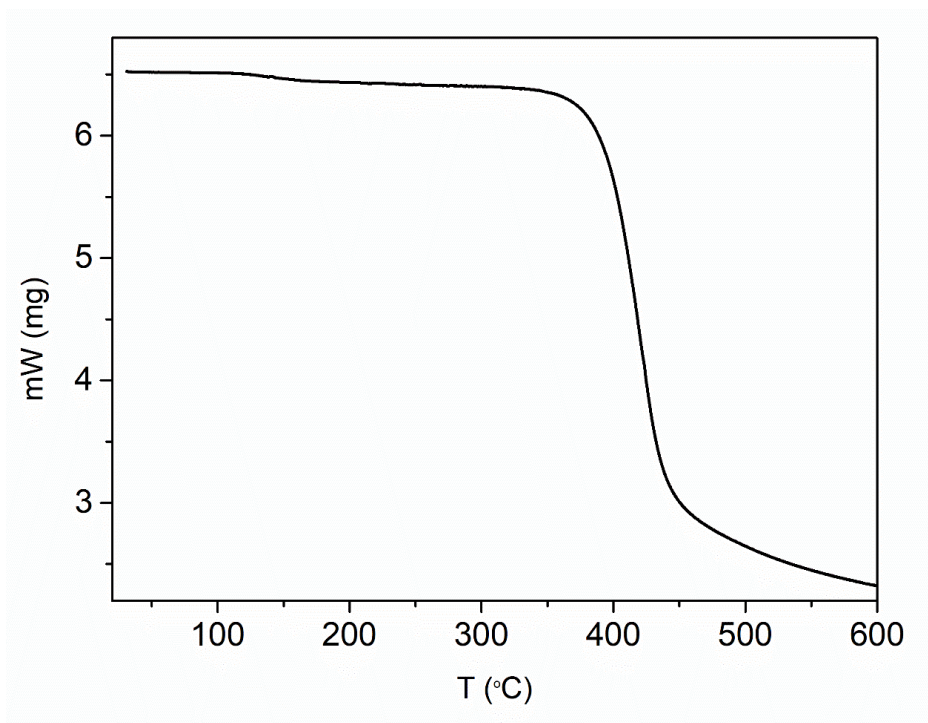

**Fig. S29.** TGA curve of desolvated pyrrolidine@**EtP6** upon removal of pyrrolidine.

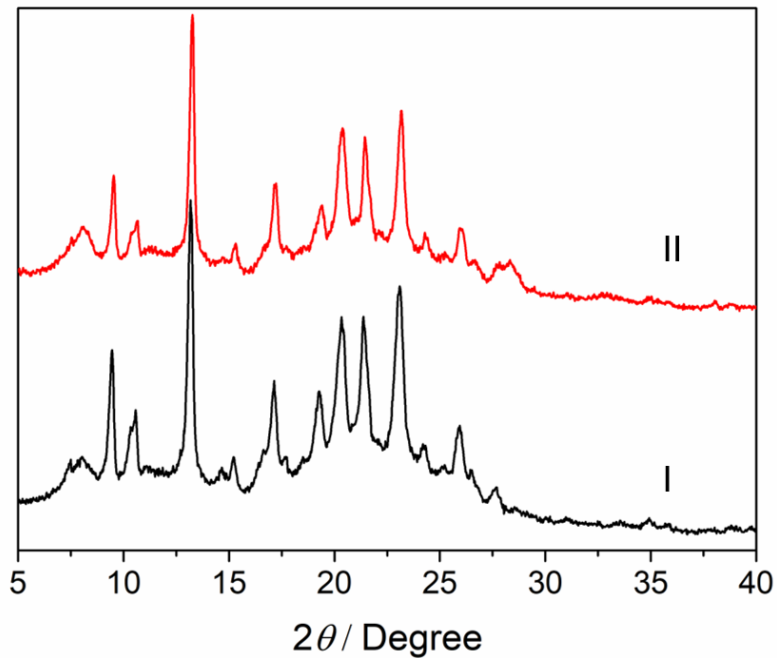

**Fig. S30.** PXRD of **EtP6**: (I) original **EtP6** $\beta$ ; (II) desolvated pyrrolidine@**EtP6**. This means that upon removal of pyrrolidine, pyrrolidine@**EtP6** transforms back to **EtP6** $\beta$ .

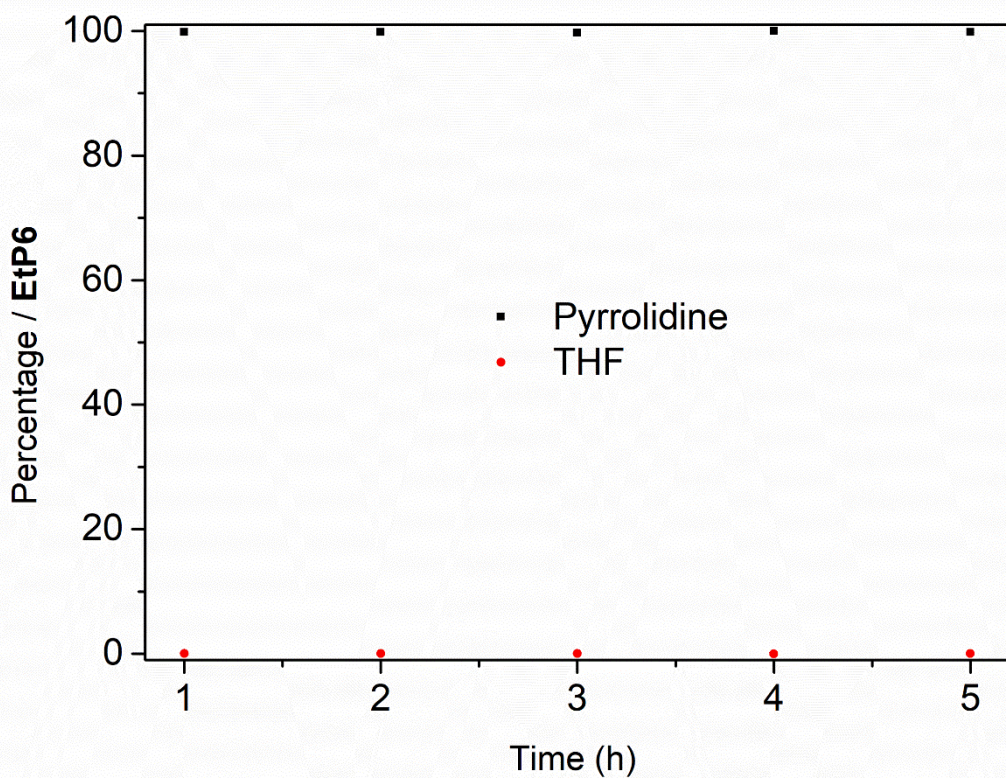

**Fig. S31.** Relative uptakes of THF and pyrrolidine by **EtP6 $\beta$**  over 2 h after **EtP6 $\beta$**  was recycled five times.

### 7. References

- S1 Hu, X.-B.; Chen, Z.; Zhang, L.; Hou, J.-L.; Li, Z.-T. *Chem. Commun.* 2012, **48**, 10999.
- S2 Jie, K.; Liu, M.; Zhou, Y.; Little, M. A.; Pulido, A.; Chong, S. Y.; Stephenson, A.; Hughes, A. R.; Sakakibara, F.; Ogoshi, T.; Blanc, F.; Day, G. M.; Huang, F.; A. I. Cooper. *J. Am. Chem. Soc.* 2018, **140**, 6921.
